# Supplementary material for: Situation of Self-Reported Anxiety and Depression among Urban Refugees and Asylum Seekers in Thailand, 2019
Source: MDPI journal article supplement (doi:10.3390/ijerph18147269), 2021-07-07
Supplement: s1 [file s1]

| Country     | Sex    | Age | Total number from BRC list | Total samples required | Total participants attending the survey | Weighted |
|-------------|--------|-----|----------------------------|------------------------|-----------------------------------------|----------|
| Afghanistan | male   | <15 | 23                         | 2                      | 1                                       | 23.00    |
| Afghanistan | male   | ≥15 | 26                         | 2                      | 3                                       | 8.67     |
| Afghanistan | female | <15 | 16                         | 2                      | 1                                       | 16.00    |
| Afghanistan | female | ≥15 | 45                         | 2                      | 2                                       | 22.50    |
| Cambodia    | male   | <15 | 30                         | 2                      | 2                                       | 15.00    |
| Cambodia    | male   | ≥15 | 72                         | 4                      | 4                                       | 18.00    |
| Cambodia    | female | <15 | 39                         | 3                      | 1                                       | 39.00    |
| Cambodia    | female | ≥15 | 57                         | 4                      | 4                                       | 14.25    |
| China       | male   | <15 | 2                          | 1                      | 2                                       | 1.00     |
| China       | male   | ≥15 | 22                         | 2                      | 1                                       | 22.00    |
| China       | female | <15 | 14                         | 2                      | 1                                       | 14.00    |
| China       | female | ≥15 | 13                         | 2                      | 2                                       | 6.50     |
| Iraq        | male   | <15 | 12                         | 2                      | 1                                       | 12.00    |
| Iraq        | male   | ≥15 | 32                         | 2                      | 2                                       | 16.00    |
| Iraq        | female | <15 | 25                         | 2                      | 1                                       | 25.00    |
| Iraq        | female | ≥15 | 28                         | 2                      | 3                                       | 9.33     |
| Sri Lanka   | male   | <15 | 13                         | 2                      | 2                                       | 6.50     |
| Sri Lanka   | male   | ≥15 | 30                         | 2                      | 1                                       | 30.00    |
| Sri Lanka   | female | <15 | 31                         | 2                      | 2                                       | 15.50    |
| Sri Lanka   | female | ≥15 | 21                         | 2                      | 2                                       | 10.50    |
| Pakistan    | male   | <15 | 243                        | 15                     | 14                                      | 17.36    |
| Pakistan    | male   | ≥15 | 392                        | 25                     | 22                                      | 17.82    |
| Pakistan    | female | <15 | 275                        | 18                     | 13                                      | 21.15    |
| Pakistan    | female | ≥15 | 318                        | 20                     | 23                                      | 13.83    |
| Palestine   | male   | <15 | 37                         | 2                      | 1                                       | 37.00    |
| Palestine   | male   | ≥15 | 56                         | 4                      | 1                                       | 56.00    |
| Palestine   | female | <15 | 33                         | 2                      | 1                                       | 33.00    |
| Palestine   | female | ≥15 | 52                         | 2                      | 3                                       | 17.33    |
| Somali      | male   | <15 | 40                         | 2                      | 2                                       | 20.00    |
| Somali      | male   | ≥15 | 72                         | 5                      | 1                                       | 72.00    |
| Somali      | female | <15 | 29                         | 2                      | 2                                       | 14.50    |
| Somali      | female | ≥15 | 20                         | 2                      | 5                                       | 4.00     |
| Vietnam     | male   | <15 | 183                        | 11                     | 9                                       | 20.33    |
| Vietnam     | male   | ≥15 | 250                        | 16                     | 13                                      | 19.23    |
| Vietnam     | female | <15 | 197                        | 13                     | 11                                      | 17.91    |
| Vietnam     | female | ≥15 | 231                        | 15                     | 12                                      | 19.25    |
| Syria       | male   | <15 | 9                          | 2                      | 1                                       | 9.00     |
| Syria       | male   | ≥15 | 12                         | 2                      | 3                                       | 4.00     |
| Syria       | female | <15 | 11                         | 2                      | 2                                       | 5.50     |
| Syria       | female | ≥15 | 10                         | 2                      | 1                                       | 10.00    |
