# Supplementary material for: Situation of Self-Reported Anxiety and Depression among Urban Refugees and Asylum Seekers in Thailand, 2019
Source: MDPI journal article supplement (doi:10.3390/ijerph18147269), 2021-07-07
Supplement: s1 [file s1]

### Supplementary file 3: Multivariate model in three different SDH groups

#### A1: Non-modifiable factors and anxiety

| Independent variables                        | Number of respondents who are not anxious (%) | Number of respondents who are anxious (%) | Adjusted OR (95% CI) | P-value of adjusted OR |
|----------------------------------------------|-----------------------------------------------|-------------------------------------------|----------------------|------------------------|
| Gender                                       |                                               |                                           |                      |                        |
| Female                                       | 26 (51.0)                                     | 61 (48.4)                                 | 1.0                  |                        |
| Male                                         | 25 (49.0)                                     | 65 (51.6)                                 | 1.0 (0.4-2.6)        | 0.995                  |
| Age (years)                                  |                                               |                                           |                      |                        |
| < 15                                         | 36 (70.6)                                     | 37 (29.4)                                 | 1.0                  |                        |
| 15-60                                        | 14 (27.4)                                     | 81 (64.3)                                 | 8.4 (3.0-23.4)       | <0.001                 |
| > 60                                         | 1 (2.0)                                       | 8 (6.3)                                   | 5.7 (0.6-49.6)       | 0.118                  |
| Region                                       |                                               |                                           |                      |                        |
| South East Asia and China                    | 29 (56.9)                                     | 40 (31.7)                                 | 1.0                  |                        |
| Others                                       | 22 (43.1)                                     | 86 (68.3)                                 | 2.3 (0.5-11.2)       | 0.289                  |
| Religion                                     |                                               |                                           |                      |                        |
| Buddhism                                     | 7 (13.7)                                      | 8 (6.3)                                   | 1.0                  |                        |
| Christ                                       | 24 (47.1)                                     | 46 (36.5)                                 | 3.4 (0.6-20.0)       | 0.172                  |
| Muslim                                       | 18 (35.3)                                     | 67 (53.2)                                 | 3.7 (0.3-38.8)       | 0.280                  |
| Others                                       | 2 (3.9)                                       | 5 (4.0)                                   | 2.6 (0.2-33.7)       | 0.463                  |
| Period of living in Thailand (years) (n=137) |                                               |                                           |                      |                        |
| < 5                                          | 19 (54.3)                                     | 41 (40.2)                                 | 1.0                  |                        |
| ≥ 5                                          | 16 (45.7)                                     | 61 (59.8)                                 | 1.6 (0.6-4.1)        | 0.361                  |
| Total                                        | 51                                            | 126                                       |                      |                        |

#### A2: Social class factors and anxiety

| Independent variables      | Number of respondents who are not anxious (%) | Number of respondents who are anxious (%) | Adjusted OR (95% CI) | P-value of adjusted OR |
|----------------------------|-----------------------------------------------|-------------------------------------------|----------------------|------------------------|
| Education                  |                                               |                                           |                      |                        |
| Up to primary level        | 40 (78.4)                                     | 77 (61.1)                                 | 1.0                  |                        |
| Up to secondary level      | 10 (19.6)                                     | 30 (23.8)                                 | 0.8 (0.3-2.2)        | 0.667                  |
| Degree or above            | 1 (2.0)                                       | 19 (15.1)                                 | 19.9 (2.3-174.7)     | 0.007                  |
| Marital status (n=175)     |                                               |                                           |                      |                        |
| Single                     | 41 (82.0)                                     | 53 (42.4)                                 | 1.0                  |                        |
| Married                    | 8 (16.0)                                      | 70 (56.0)                                 | 3.7 (1.4-9.6)        | 0.007                  |
| Widow/divorced/separated   | 1 (2.0)                                       | 2 (1.6)                                   | 2.5 (0.2-27.4)       | 0.446                  |
| Financial status (n=143)   |                                               |                                           |                      |                        |
| Income lower than expense  | 25 (56.8)                                     | 50 (50.5)                                 | 1.0                  |                        |
| Income equal to expense    | 13 (29.6)                                     | 30 (30.3)                                 | 1.1 (0.4-2.6)        | 0.900                  |
| Income higher than expense | 6 (13.6)                                      | 19 (19.2)                                 | 1.8 (0.5-6.2)        | 0.372                  |
| Total                      | 51                                            | 126                                       |                      |                        |

### A3: Individual risk factors and anxiety

| Independent variables    | Number of respondents who are not anxious (%) | Number of respondents who are anxious (%) | Adjusted OR (95% CI) | P-value of adjusted OR |
|--------------------------|-----------------------------------------------|-------------------------------------------|----------------------|------------------------|
| Chronic diseases (n=175) |                                               |                                           |                      |                        |
| No                       | 46 (92.0)                                     | 90 (72.0)                                 | 1.0                  |                        |
| Yes                      | 4 (8.0)                                       | 35 (28.0)                                 | 4.6 (1.4-14.7)       | 0.010                  |
| Alcohol drinking (n=174) |                                               |                                           |                      |                        |
| No                       | 50 (98.0)                                     | 117 (95.1)                                | 1.0                  |                        |
| Yes                      | 1 (2.0)                                       | 6 (4.9)                                   | 1.7 (0.2-14.5)       | 0.615                  |
| Smoking (n=175)          |                                               |                                           |                      |                        |
| No                       | 49 (96.1)                                     | 113 (91.1)                                | 1.0                  |                        |
| Yes                      | 2 (3.9)                                       | 11 (8.9)                                  | 1.9 (0.3-10.4)       | 0.473                  |
| Total                    | 51                                            | 126                                       |                      |                        |

### D1: Non-modifiable factors and depression

| Independent variables                        | Number of respondents who are not depressed (%) | Number of respondents who are depressed (%) | Adjusted OR (95% CI) | P-value of adjusted OR |
|----------------------------------------------|-------------------------------------------------|---------------------------------------------|----------------------|------------------------|
| Gender                                       |                                                 |                                             |                      |                        |
| Female                                       | 45 (47.9)                                       | 39 (54.9)                                   | 1.0                  |                        |
| Male                                         | 49 (52.1)                                       | 32 (45.1)                                   | 0.7 (0.3-1.6)        | 0.408                  |
| Age (years)                                  |                                                 |                                             |                      |                        |
| < 15                                         | 46 (48.9)                                       | 26 (36.6)                                   | 1.0                  |                        |
| 15-60                                        | 47 (50.0)                                       | 40 (56.3)                                   | 3.3 (1.3-7.9)        | 0.009                  |
| > 60                                         | 1 (1.1)                                         | 5 (7.1)                                     | 6.9 (1.0-48.8)       | 0.054                  |
| Region                                       |                                                 |                                             |                      |                        |
| South East Asia and China                    | 53 (56.4)                                       | 13 (18.3)                                   | 1.0                  |                        |
| Others                                       | 41 (43.6)                                       | 58 (81.7)                                   | 4.4 (1.0-18.7)       | 0.043                  |
| Religion                                     |                                                 |                                             |                      |                        |
| Buddhism                                     | 14 (14.9)                                       | 1 (1.4)                                     | 1.0                  |                        |
| Christ                                       | 45 (47.9)                                       | 22 (31.0)                                   | 4.8 (0.5-45.0)       | 0.167                  |
| Muslim                                       | 30 (31.9)                                       | 46 (64.8)                                   | 7.5 (0.6-100.0)      | 0.127                  |
| Others                                       | 5 (5.3)                                         | 2 (2.8)                                     | 1.5 (0.1-27.9)       | 0.796                  |
| Period of living in Thailand (years) (n=125) |                                                 |                                             |                      |                        |
| < 5                                          | 31 (49.2)                                       | 22 (35.5)                                   | 1.0                  |                        |
| ≥ 5                                          | 32 (50.8)                                       | 40 (64.5)                                   | 1.0 (0.4-2.5)        | 0.991                  |
| Total                                        | 94                                              | 71                                          |                      |                        |

## D2: Social class factors and depression

| Independent variables      | Number of respondents who are not depressed (%) | Number of respondents who are depressed (%) | Adjusted OR (95% CI) | P-value of adjusted OR |
|----------------------------|-------------------------------------------------|---------------------------------------------|----------------------|------------------------|
| Education                  |                                                 |                                             |                      |                        |
| Up to primary level        | 66 (70.2)                                       | 44 (62.0)                                   | 1.0                  |                        |
| Up to secondary level      | 24 (25.5)                                       | 14 (19.7)                                   | 0.5 (0.2-1.5)        | 0.227                  |
| Degree or above            | 4 (4.3)                                         | 13 (18.3)                                   | 3.1 (0.8-12.1)       | 0.107                  |
| Marital status (n=163)     |                                                 |                                             |                      |                        |
| Single                     | 56 (60.9)                                       | 34 (47.9)                                   | 1.0                  |                        |
| Married                    | 35 (38.0)                                       | 34 (47.9)                                   | 1.3 (0.5-2.9)        | 0.587                  |
| Widow/divorced/Separated   | 1 (1.1)                                         | 3 (4.2)                                     | 4.4 (0.3-56.9)       | 0.260                  |
| Financial status (n=135)   |                                                 |                                             |                      |                        |
| Income lower than expense  | 37 (50.7)                                       | 35 (56.4)                                   | 1.0                  |                        |
| Income equal to expense    | 19 (26.0)                                       | 22 (35.5)                                   | 1.0 (0.4-2.4)        | 0.970                  |
| Income higher than expense | 17 (22.3)                                       | 5 (8.1)                                     | 0.4 (0.1-1.2)        | 0.094                  |
| Chronic diseases (n=163)   |                                                 |                                             |                      |                        |
| No                         | 80 (87.0)                                       | 46 (64.8)                                   | 1.0                  |                        |
| Yes                        | 12 (13.0)                                       | 25 (35.2)                                   | 3.8 (1.6-9.1)        | 0.002                  |
| Alcohol drinking (n=163)   |                                                 |                                             |                      |                        |
| No                         | 89 (96.7)                                       | 68 (95.8)                                   | 1.0                  |                        |
| Yes                        | 3 (3.3)                                         | 3 (4.2)                                     | 0.9 (0.2-4.4)        | 0.934                  |
| Smoking (n=164)            |                                                 |                                             |                      |                        |
| No                         | 87 (93.5)                                       | 63 (88.7)                                   | 1.0                  |                        |
| Yes                        | 6 (6.5)                                         | 8 (11.3)                                    | 1.7 (0.4-7.1)        | 0.434                  |
| Total                      | 94                                              | 71                                          |                      |                        |

## D3: Individual risk factors and depression

| Independent variables    | Number of respondents who are not depressed (%) | Number of respondents who are depressed (%) | Adjusted OR (95% CI) | P-value of adjusted OR |
|--------------------------|-------------------------------------------------|---------------------------------------------|----------------------|------------------------|
| Chronic diseases (n=163) |                                                 |                                             |                      |                        |
| No                       | 80 (87.0)                                       | 46 (64.8)                                   | 1.0                  |                        |
| Yes                      | 12 (13.0)                                       | 25 (35.2)                                   | 3.8 (1.6-9.1)        | 0.002                  |
| Alcohol drinking (n=163) |                                                 |                                             |                      |                        |
| No                       | 89 (96.7)                                       | 68 (95.8)                                   | 1.0                  |                        |
| Yes                      | 3 (3.3)                                         | 3 (4.2)                                     | 0.9 (0.2-4.4)        | 0.934                  |
| Smoking (n=164)          |                                                 |                                             |                      |                        |
| No                       | 87 (93.5)                                       | 63 (88.7)                                   | 1.0                  |                        |
| Yes                      | 6 (6.5)                                         | 8 (11.3)                                    | 1.7 (0.4-7.1)        | 0.434                  |
| Total                    | 94                                              | 71                                          |                      |                        |
